1 **Elasticity of dense actin networks produces nanonewton protrusive forces**

2

3 Marion Jasnin<sup>1,\*</sup>, Jordan Hervy<sup>2</sup>, Stéphanie Balor<sup>3</sup>, Anais Bouissou<sup>4</sup>, Amsha Proag<sup>4</sup>, Raphaël  
4 Voituriez<sup>5</sup>, Isabelle Maridonneau-Parini<sup>4</sup>, Wolfgang Baumeister<sup>1</sup>, Serge Dmitrieff<sup>2,\*</sup>, Renaud  
5 Poincloux<sup>4,\*</sup>

6

7 <sup>1</sup> Department of Molecular Structural Biology, Max Planck Institute of Biochemistry, Martinsried,  
8 Germany

9 <sup>2</sup> Université de Paris, CNRS, Institut Jacques Monod, Paris, France

10 <sup>3</sup> Plateforme de Microscopie Électronique Intégrative, Centre de Biologie Intégrative, CNRS,  
11 Toulouse, France

12 <sup>4</sup> Institut de Pharmacologie et de Biologie Structurale, Université de Toulouse, CNRS, UPS,  
13 France

14 <sup>5</sup> Laboratoire Jean Perrin, CNRS, Sorbonne Université, Paris, France

15 \* Correspondence: [jasnin@biochem.mpg.de](mailto:jasnin@biochem.mpg.de); [serge.dmitrieff@ijm.fr](mailto:serge.dmitrieff@ijm.fr); [renaud.poincloux@ipbs.fr](mailto:renaud.poincloux@ipbs.fr)

## 16 **Abstract**

17 Actin filaments assemble into force-generating systems involved in diverse cellular functions,  
18 including cell motility, adhesion, contractility and division. It remains unclear how networks of actin  
19 filaments, which individually generate piconewton forces, can produce forces reaching tens of  
20 nanonewtons. Here we use *in situ* cryo-electron tomography to unveil how the nanoscale  
21 architecture of macrophage podosomes enables basal membrane protrusion. We show that the  
22 sum of the actin polymerization forces at the membrane is not sufficient to explain podosome  
23 protrusive forces. Quantitative analysis of podosome organization demonstrates that the core is  
24 composed of a dense network of bent actin filaments storing elastic energy. Theoretical modelling  
25 of the network as a spring-loaded elastic material reveals that it exerts forces of up to tens of  
26 nanonewtons, similar to those evaluated experimentally. Thus, taking into account not only the  
27 interface with the membrane but also the bulk of the network, is crucial to understand force  
28 generation by actin machineries. Our integrative approach sheds light on the elastic behavior of  
29 dense actin networks and opens new avenues to understand force production inside cells.

30

## 31 **Introduction**

32 Actin, one of the most abundant proteins in eukaryotic cells, organize into force-generating  
33 filamentous networks, which play pivotal roles in cell motility, adhesion, endocytosis and vesicular  
34 traffic <sup>1,2</sup>. Thermodynamics showed that actin polymerization generates mechanical forces by the  
35 addition of new monomers at the end of a fluctuating filament <sup>3,4</sup>. Typical stall forces of a  
36 polymerizing actin filament were estimated in the 1-10 pN range <sup>3,5,6</sup>, in agreement with  
37 experimental values of 1.5 pN found by optical trap measurements <sup>7</sup>. Thus, polymerization of actin  
38 filaments against a membrane is capable of extruding thin membrane tubes or forming plasma  
39 membrane invaginations in mammalian cells in a force range of a few tens of pN <sup>8-10</sup>.

40 The forces exerted by actin filaments can also reach a much higher regime, in the  
41 nanonewton (nN) range <sup>11,12</sup>. At the leading edge of motile cells, branched actin networks in  
42 lamellipodial protrusions produce local forces of ~1 nN <sup>13,14</sup>. During yeast endocytosis, the actin  
43 machinery generates similar forces to overcome the turgor pressure pushing the invagination  
44 outwards <sup>15</sup>. At the basal membrane of myeloid cells, podosomes probe the stiffness of the  
45 extracellular environment through the generation of forces reaching tens of nN <sup>16</sup>. Unlike the lower  
46 force regime, the mechanisms by which meshworks of actin filaments produce nN forces remain  
47 unknown.

48 If the force generated by an actin network corresponds to the sum of the polymerization

49 forces generated by single filaments pushing against a load, then hundreds to thousands of  
50 filaments would need to continuously grow against the surface to reach the nN range.  
51 Alternatively, filaments could push on the membrane with shallow angles <sup>17,18</sup>. It was also  
52 proposed that the actin network could store elastic energy, and thus exert a restoring force. In the  
53 low force regime, bending of endocytic filaments observed in animal cells has been proposed to  
54 store elastic energy for pit internalization <sup>19</sup>. In the large force regime, a theoretical model with  
55 non-deformable filaments showed that a large force would cause elastic energy to be stored in  
56 cross-linkers deformation <sup>20</sup>. However, none of these hypotheses have been explored in native  
57 actin machineries generating forces of several nN, due to the difficulty to combine direct  
58 observation of the actin network architecture and the knowledge of the exerted force.

59 To date, cryo-electron tomography (cryo-ET) is the only technique that resolves single  
60 actin filaments inside unperturbed cellular environments <sup>21-23</sup>. Here we use cryo-ET to unveil the  
61 three-dimensional (3D) architecture of human macrophage podosomes and elucidate their force  
62 generation mechanism. These submicrometric structures are composed of a protrusive core of  
63 actin filaments surrounded by an adhesion ring. The balance of forces requires the protrusion  
64 force applied by the core on the substrate to be counteracted by a force of equal magnitude.  
65 Protrusion force microscopy (PFM) revealed that this balance of forces takes place locally through  
66 traction at the adhesion ring <sup>16,24,25</sup>, which has been proposed to be transmitted by radial actin  
67 cables connecting the core to the ring <sup>25</sup>. Here we visualize these radial filaments and  
68 quantitatively analyze the 3D organization of the core and ring networks. We show that the  
69 protrusive forces generated by podosomes cannot be explained by the sum of the actin  
70 polymerization forces at the core membrane but by the storage of elastic energy into the dense  
71 network of bent actin filaments. These results explain how cellular actin networks can act as a  
72 spring-loaded elastic material to exert forces of up to tens of nanonewtons.

73

## 74 **Results**

### 75 **Cryo-ET allows quantitative analysis of filament organization in podosomes**

76 Owing to their size and location at the basal cell membrane, native podosomes are amenable to  
77 cryo-ET exploration using cryo-focused ion beam (cryo-FIB) milling sample preparation. We  
78 prepared thin vitrified sections (so-called wedges) containing podosomes using shallow incidence  
79 angles of the ion beam and subjected them to cryo-ET (**Figure 1A and Movie S1**). Segmentation  
80 of the tomograms revealed that podosomes are made of a core of oblique filaments surrounded  
81 by radial filaments (**Figure 1B-C and Movie S1**), as predicted previously <sup>25</sup>. Other cytoskeletal

82 elements, cellular organelles, ribosomes and glycogen granules are excluded from the core and  
83 radial actin networks, gathering either at the periphery or on top of podosomes (**Figure 1A-B and**  
84 **Movie S1**).

85 Quantitative analysis of filament organization highlighted the specificity of the actin core  
86 in terms of filament length, density and orientation with respect to the basal membrane (**Methods**  
87 **and Figures S1-S3**). All of these parameters exhibit a sharp transition as a function of the radial  
88 distance from the core center (**Figure 1D-F**). Density is higher inside the core by a factor of 2 to 3  
89 (**Figure 1D**) and filaments display a mean orientation of  $50 \pm 21^\circ$  relative to the plasma membrane,  
90 as compared to the flatter  $23 \pm 21^\circ$  outside the core (**Figure 1E and Figure S4A-B**). Core filaments  
91 are shorter than the surrounding radial filaments, with mean lengths of  $119 \pm 52$  nm and  $181 \pm 134$   
92 nm, respectively (**Figure 1F and Figure S4C-D**). Further analysis of the transition curves for the  
93 filament orientation provided a mean core radius of  $203 \pm 38$  nm for a total of ten podosomes  
94 (**Figure 1E, inset**). This agrees with the values obtained from the fits of the other parameters  
95 (**Figure S5**).

96 Since the milling procedure removed the top of the podosomes, we also imaged  
97 podosomes exposed by cell unroofing prior to cryo-fixation to get a complete picture of podosome  
98 organization (**Figure S6 and Movie S2**). In addition to the core and radial filaments observed  
99 previously, we detected horizontal filaments on top of the core as well as in between neighboring  
100 cores. These filaments, which may have been lifted up from the plasma membrane during  
101 podosome growth, could also participate in the generation of the traction forces that  
102 counterbalance the protrusion forces generated by podosomes<sup>25</sup>.

103

#### 104 **The sum of the actin polymerization forces at the core membrane is below 1 nN**

105 To evaluate the forces generated by actin polymerization on the plasma membrane beneath the  
106 podosome core, where protrusion occurs<sup>16,24,25</sup>, we identified filament segments in the close  
107 vicinity of and protruding against the plasma membrane (**Figure 2A and Movie S3**). We found an  
108 average of  $45 \pm 29$  filaments per podosome, with a mean orientation of  $61 \pm 6^\circ$  relative to the  
109 plasma membrane (**Figure 2B**). This rules out the first two hypotheses, namely that 1) hundreds  
110 to thousands of filaments are growing at the same time onto the plasma membrane, or that 2)  
111 filaments are pushing with shallow angles. In addition, using the upper limit of 10 pN for the stall  
112 force of a single filament growing perpendicularly to the membrane<sup>3,5,6,26</sup>, taking into account  
113 filament orientation<sup>17</sup>, and considering that all these filaments are polymerizing concomitantly,  
114 we evaluated a maximal polymerization force of  $615 \pm 396$  pN per podosome (ten podosomes

115 evaluated; **Methods and Figure 2C-D**). This is one order of magnitude lower than the experimental  
116 values<sup>16</sup>. We therefore concluded that the total force produced by polymerization of actin  
117 filaments against the plasma membrane is not sufficient to generate the protrusive forces exerted  
118 by podosomes.

119

## 120 **The actin core stores elastic energy**

121 Next, we tested the third hypothesis, that is, the storage of elastic energy in the network. Visual  
122 inspection of the networks indicated that podosome filaments are bent (**Figure 3A and Movie S4**).  
123 The projection of each filament on the vertical plane passing through its two ends highlighted the  
124 variation of their local curvature along the filament length (**Methods and Figure 3B-C**). Quantitative  
125 analysis of filament curvature revealed an average compressive strain of  $4.2 \pm 0.4\%$  for all  
126 filaments, independently of their localization within the podosome (**Figure 3D and Figure S7**). We  
127 therefore evaluated the elastic energy using the theory of linear elasticity: actin filaments can be  
128 modeled as semi-flexible polymers with the following elastic energy at the single filament level<sup>27</sup>:

$$129 \quad u_{elastic} = \frac{\kappa}{2} \int \left\| \frac{\partial t(s)}{\partial s} \right\|^2 ds \quad (\text{Eq. 1})$$

130 where  $\kappa \sim 4 \cdot 10^{-26}$  N.m<sup>2</sup> is the bending modulus<sup>28</sup>,  $t(s)$  is the tangent vector as a function of the  
131 arc-length coordinate  $s$ , and the integrand represents the square of the local curvature along the  
132 filament (**Methods and Figure S8A**). We evaluated the elastic energy per unit volume as the sum  
133 of the energies over all filaments in a given interval at a radial distance  $r$  from the core (**Figure**  
134 **S8B**). The density of elastic energy stored inside the core is much larger than that outside the  
135 core, by factors ranging from 3 to 10 (**Figure 3E**). This is consistent with the larger actin density  
136 by factors of 2 to 6 measured inside the core (**Figure 1D**). Therefore, this specific architecture  
137 allows the system to store elastic energy inside the podosome core, ranging from  $\sim 10^4 k_B T$  to  
138  $\sim 5 \cdot 10^4 k_B T$ . This corresponds to  $40 k_B T$  per filament on average, which is much larger than the  
139 scale of thermal fluctuations.

140

## 141 **The actin core generates an elastic force in the nN range**

142 To test whether the stored elastic energy can account for podosome protrusion forces, we next  
143 evaluated the elastic force generated through the compression of the actin network. Assuming  
144 that the podosome core behaves as a homogeneous elastic material, the force exerted by the  
145 core is such that its work for a small deformation of amplitude  $\delta h_{core}$  is equal to  $U_{elastic}^{core}$  (the total  
146 elastic energy stored in the podosome core), with  $\delta h_{core} = \epsilon_{core} \times h_{core}$  ( $\epsilon_{core}$  is the average

147 filament compressive strain in the core and  $h_{core}$  is the core height; **Methods**). We thus find:

$$148 \quad F_{elastic}^{core} \approx \frac{U_{elastic}^{core}}{\epsilon_{core} \times h_{core}} \quad (\text{Eq. 2})$$

149 Using **Eq. 2**, we found an average elastic force of  $9.7 \pm 4.2$  nN, close to the mean value of  $10.4 \pm 3.8$   
150 nN reported from PFM measurements <sup>16</sup>. The elastic force varies significantly between  
151 podosomes, with values ranging from 4.1 to 14.4 nN (**Figure 4A**). This can be explained by the  
152 disparity in the core size in our tomograms. Consistently with this, the force per unit area of the  
153 core exhibits less variation with an average value of  $P = 71.1 \pm 12.9$  kPa (**Methods**). This is in  
154 agreement, within the experimental margin of error, with the pressure estimated by PFM <sup>16</sup>  
155 (**Methods and Figure 4B**) and in the same order of magnitude as that produced during endocytosis  
156 in yeast <sup>18</sup>. Note that the elastic energy stored by the network, and thus the elastic force, are  
157 underestimated here since we do not take into account the elastic energy stored by crosslinkers  
158 <sup>20</sup>.

159

## 160 **Mechanical properties of the podosome**

161 Knowing the elastic force, and thus the pressure  $P$ , allowed us to estimate the Young's modulus of  
162 the core:  $Y = P / \epsilon_{core} = 1.7$  MPa. While this value is several orders of magnitude larger than  
163 reported values for reconstituted and cellular actin networks <sup>29,30</sup>, it is compatible with the very  
164 high actin density in the core. Actin itself has a Young's modulus  $Y_a = 2.3$  GPa <sup>31</sup>. The elastic  
165 modulus that can be reached by an actin network can be estimated as  $Y = Y_a \phi^2$ , with  $\phi$  the  
166 volume fraction occupied by actin filaments <sup>32</sup>, yielding an upper limit of 12 MPa in podosomes.  
167 Thus, the Young's modulus we find for the podosome core is well within expected values and  
168 helps understand how a compressive strain of less than 5% translates into forces in the  
169 nanonewton range.

170 The protrusive force exerted by the core on the substrate is balanced by an opposing force  
171 transmitted by the radial filaments to the adhesion ring, which prevents the core from relaxing  
172 towards the cell interior. We can estimate the surface tension,  $\sigma$ , of the 2D meshwork of radial  
173 filaments that is required to balance the force  $F_{elastic}^{core}$ , knowing the mean radius of the core,  
174  $r_{core}$ , and the mean angle of the radial filaments,  $\theta_{radial}$ , with respect to the membrane plane  
175 (**Figure 4C and Figure S4B**):

$$176 \quad \sigma = \frac{F_{elastic}^{core}}{2\pi r_{core} \sin \theta_{radial}} \sim 20 \text{ mN/m} \quad (\text{Eq. 3})$$

177 While this tension is one order of magnitude larger than the cortical tension of rounding mitotic

178 cells<sup>33</sup>, it is the same order of magnitude as the tension inferred for some adhering cells, from 6  
179 mN/m<sup>34</sup> to 100 mN/m<sup>35</sup>.

180

## 181 Discussion

182 In summary, our results showed that mechanical energy accumulates inside the podosome core  
183 through bending of the dense network of actin filaments (Figure 1 and Figure 3). To relax, the  
184 elastic energy produces an elastic force, which is balanced by radial tension between the actin  
185 core and the adhesion ring. Indeed, we found that the elastic force computed from the bending  
186 energy matches the protrusive force measured experimentally (Figure 4). We revealed that the  
187 load borne by actin filaments in contact with the membrane is greater than the stall force, making  
188 their growth thermodynamically unfavorable (Figure 2). In addition, the need to synchronize their  
189 growth against the membrane would drastically slow down the polymerization process<sup>36</sup>. Thus,  
190 how the network assembles under force remains to be understood.

191 One possibility is that actin filaments do not grow directly against the load at the  
192 membrane, which would instead be borne by the existing dense and compressed network. They  
193 would rather grow bent in the bulk of the podosome core in a dense environment, thus increasing  
194 the elastic energy stored by the network, which can then relax by pushing against the membrane.  
195 An estimation of the energy released by actin polymerization in the core, by summing over all  
196 actin monomers<sup>17</sup>, yields  $1 - 3 \cdot 10^5 k_B T$ , which is one order of magnitude larger than the elastic  
197 energy  $U_{elastic}^{core}$ . While some of the polymerization energy will be dissipated as heat, the  
198 polymerization reaction can still significantly contribute to the loading of the network.

199 Another possibility is that the filaments grow under a much smaller force, and that the  
200 network is then loaded by the active tension of the actomyosin cables driven by myosin II. This  
201 would be consistent with the decrease in pushing force when myosin II is inhibited<sup>24</sup>. In this  
202 scenario, the energy source would be mostly ATP consumed by myosin II rather than the  
203 polymerization energy. We expect that a combination of experiments and simulation will be able  
204 to clarify the assembly of such a spring-loaded network.

205 In conclusion, to understand the forces applied by actin assemblies, it is not sufficient to  
206 consider only the local actin-membrane interactions; rather, the whole system must be taken into  
207 account. Through a combination of quantitative analysis and modelling of the native 3D  
208 architecture of macrophage podosomes, we showed that elastic energy is stored in actin networks  
209 *in vivo*, allowing forces of the order of ten nN to be produced. These results highlight the  
210 possibilities opened by exploring the architecture of actin networks *in situ* at the molecular scale.

211 Given the rapid progress of cryo-ET, we expect that, building on our biophysical approach, it will  
212 soon be possible to address other degrees of freedom for elastic energy storage, such as  
213 crosslinker deformation and filament twisting, and to shed light on other modes of force generation  
214 by cellular machineries.



## 215 **Methods**

### 216 **Differentiation and culture of primary monocyte-derived macrophages**

217 Human monocytes were isolated from the blood of healthy donors as described previously <sup>37</sup>.  
218 Cells were resuspended in cold phosphate buffered saline (PBS) supplemented with 2 mM EDTA,  
219 0.5% heat-inactivated Fetal Calf Serum (FCS) at pH 7.4 and magnetically sorted with magnetic  
220 microbeads coated with antibodies directed against CD14 (Miltenyi Biotec). Monocytes were then  
221 seeded on glass coverslips at  $1.5 \times 10^6$  cells/well in six-well plates in RPMI 1640 (Invitrogen)  
222 without FCS. After 2h at 37°C in a humidified 5% CO<sub>2</sub> atmosphere, the medium was replaced by  
223 RPMI containing 10% FCS and 20 ng/mL of Macrophage Colony-Stimulating Factor (M-CSF)  
224 (Peprotech). For experiments, cells were harvested at day 7 using trypsin-EDTA (Fisher  
225 Scientific) and centrifugation (320g, 10 min).

226

### 227 **Cell vitrification**

228 Gold EM grids with R1/4 holey SiO<sub>2</sub> film (Quantifoil) were glow-discharged in a EasiGlow (Pelco)  
229 glow discharge system. After grid sterilization under UV light, the cell suspension containing  
230 fiducials was seeded onto the grids and incubated for 2 h at 37°C to let the cells adhere to the  
231 grids, resulting in 3 to 4 cells per grid square. For cell vitrification, grids were loaded into the  
232 thermostatic chamber of a Leica EM-GP automatic plunge freezer, set at 20°C and 95% humidity.  
233 Excess solution was blotted away for 10 s with a Whatman filter paper n°1, and the grids were  
234 immediately flash frozen in liquid ethane cooled at -185°C.

235

### 236 **Unroofing**

237 When indicated, macrophages plated on grids were unroofed prior to vitrification. Cells were  
238 unroofed using distilled water containing cOmplete™ protease inhibitors (Roche) and 10 µg/mL  
239 phalloidin (Sigma-Aldrich P2141) for 30 s.

240

### 241 **Cryo-FIB milling**

242 Plunge-frozen EM grids were clipped into Autogrid frames modified for wedge milling under  
243 shallow angles <sup>38</sup>. Autogrids were mounted into a custom-built FIB-shuttle and transferred using  
244 a cryo-transfer system (PP3000T, Quorum) to the cryo-stage of a dual-beam Quanta 3D FIB/SEM  
245 (Thermo Fisher Scientific) operated at liquid nitrogen temperature <sup>39</sup>. The support film close to the

246 cells of interest was sputtered away with high beam currents of 0.5-1.0 nA to provide a reference  
247 in Z direction for wedge milling. Cells were first milled roughly at very shallow angles (typically 2-  
248 5° of the incident ion beam) with beam currents of 300-500 pA. Advancement of the milling was  
249 monitored by SEM at 5 kV and 5.92 pA. Closer to the cell surface, beam currents of 50-100 pA  
250 were used for fine milling. Once all the wedges were prepared on the grid, a final polishing step  
251 at 30-50 pA was performed to limit surface contamination.

252

### 253 **Cryo-ET and tomogram reconstruction**

254 Wedges were loaded vertically to the tilt axis in a Titan Krios transmission electron microscope  
255 (Thermo Fisher Scientific) equipped with a 300 kV field-emission gun, Volta phase plates (VPPs)  
256 (Danev et al., 2014), a post-column energy filter (Gatan, Pleasanton, CA, USA) and a 4k x 4k K2  
257 Summit direct electron detector (Gatan) operated with SerialEM. The VPPs were aligned and  
258 used as described previously <sup>40</sup>. Low-magnification images were recorded at 2250x. High-  
259 magnification tilt-series were recorded at 33,000x (calibrated pixel size 0.421 nm) with a target  
260 defocus for phase-plate imaging of 0 μm. Bi-directional tilt series were acquired typically from -  
261 30° to +60° and -32° to -60° with a tilt increment of 2° and a total dose between 150 and 200 e-  
262 /Å<sup>2</sup>. Frames were aligned with in-house software (K2Align) based on procedures developed by Li  
263 et al. <sup>41</sup>. Tilt series were aligned using the gold beads deposited on the surface of the support film  
264 as fiducial markers. 3D reconstructions with final pixel sizes of 1.684 nm were obtained by  
265 weighted-back projection using the IMOD software <sup>42</sup>.

266

### 267 **Automated filament segmentation**

268 The 4 x binned tomograms (pixel size of 1.684 nm) were subjected to nonlocal-means filtering  
269 using the Amira software <sup>43</sup> provided by Thermo Fisher Scientific. Actin filaments were traced  
270 using an automated segmentation algorithm based on a generic filament as a template <sup>44</sup>, with a  
271 diameter of 8 nm and a length of 42 nm. To reduce background noise, short filamentous structures  
272 with lengths below 60 nm (or 50 nm for the unroofed podosomes) were filtered out.

273 The coordinates of the segmented filaments were exported from Amira and used as input for data  
274 analysis in MATLAB (The MathWorks) and in python (<https://gitlab.com/jhervy/podosome-demo>).  
275 The coordinates of the filaments were resampled every 3 nm to give the same weight to every  
276 point along a filament <sup>21</sup>.

277

### 278 **Radial distance analysis**

279 All the parameters (filament length, density and orientation, compressive strain and density of  
280 elastic energy) were evaluated as detailed in **Figures S1-S3, S7 and S8**, respectively. The plots  
281 as a function of the radial distance were computed by considering all the values in a given interval  
282  $[r, r + \delta]$  at a radial distance  $r$  from the core center. A list of 21 linearly-spaced values starting  
283 from 0 to 500 nm was used for the binning of the radial distance, which corresponds to an interval  
284 value of  $\delta=25$  nm (**Figure 1D-F, Figure 3D-E, Figure S5A**).

285

### 286 **Estimation of the core radius**

287 All the parameters except the compressive strain were fitted as a function of the radial distance  $r$   
288 from the core center using the following equation:

$$289 \quad m(r) = \frac{1}{2} \left[ (a + b) + (b - a) \tanh \left( \frac{r - r_0}{r_s} \right) \right] \quad (\text{Eq. 4})$$

290  $m(r)$  is either a decreasing function (for the filament density, filament orientation and the density  
291 of elastic energy) or an increasing function (for the filament length) with two saturation values set  
292 by the parameters  $a$  and  $b$  (**Figure 1D-F and Figure 3E**). The parameter  $r_0$  corresponds to the  
293 radial distance for which the slope of the tangent line is maximum; the parameter  $r_s$  defines the  
294 transition range between the two saturating values (**Figure S5A**). We used the parameter  $r_0$  from  
295 the fit of the orientation as a measure of the core radius (**Figure S5B**).

296

### 297 **Polymerization force**

298 To estimate the polymerization force generated at the core membrane, the protrusive filaments,  
299 *i.e.* those in the immediate vicinity of the plasma membrane, were considered. Specifically, all the  
300 filament portions up to 10 nm away from the membrane were taken into account (**Figure 2A**). A  
301 single filament growing perpendicularly to the membrane generates a force given by <sup>4</sup>:

$$302 \quad f_a = \frac{k_B T}{\delta} \ln \left( \frac{C}{C_c} \right) \quad (\text{Eq. 5})$$

303 where  $k_B T = 4.11 \cdot 10^{-21}$  J,  $\delta = 2.75$  nm is the displacement induced by the addition of one actin  
304 monomer,  $C$  is the concentration of actin monomers in solution and  $C_c$  is the critical concentration.  
305 Using the values  $C = 150 \mu\text{M}$  as estimated in <sup>45</sup> and  $C_c = 0.06 \mu\text{M}$  for the critical concentration at  
306 the plus end as measured *in vitro* <sup>46,47</sup>, we found an upper limit of 11 pN for the stall force. Thus,  
307 the factor  $\ln(C/C_c)$  was set to 7 leading to a stall force of 10 pN for a single filament growing  
308 perpendicularly to the membrane. This value was increased by a factor  $1/\sin(\theta)$  for a filament  
309 having an orientation  $\theta$  relative to the membrane <sup>17</sup> (**Figure 2C**). Therefore, the total

310 polymerization force was computed as follows:

$$311 \quad F_{polym}^{core} = f_a \sum_{i=1}^{n_p} \frac{1}{\sin(\theta_i)} \quad (\text{Eq. 6})$$

312 where  $n_p$  is the number of protrusive filaments and  $\theta_i$  is the average orientation for the protrusive  
313 filament  $i$  (Figure 2D).

### 314 Local curvature

315 The local curvature was evaluated between two consecutive points using their respective tangent  
316 vector  $t$  as follows:

$$317 \quad \gamma_{i,i+1} = \frac{1}{a} \arccos(t_i \cdot t_{i+1}) \quad (\text{Eq. 7})$$

318 where  $a$  is their relative distance set to 3 nm in our segmentation procedure.

### 319 Local elastic energy

320 The local energy is proportional to the square of the local curvature and can be discretized as  
321 follows:

$$322 \quad u_{i,i+1}^{elastic} = \frac{\kappa}{2} (\gamma_{i,i+1})^2 \quad (\text{Eq. 8})$$

323 where  $\kappa$  is the bending modulus<sup>28</sup>.

324

### 325 Total elastic energy

326 The total elastic energy inside the core was computed by summing the local energy over all the  
327 filament points that are within the radial distance domain  $r \in [0, r_{core}]$ , where  $r_{core}$  is the core  
328 radius (Figure S8).

### 329 Elastic force

330 The elastic force pushing perpendicularly to the membrane is the derivative of the core elastic  
331 energy with respect to the height  $h_{core}$  of the core:

$$332 \quad F_{elastic}^{core} = \frac{dU_{elastic}^{core}}{dh_{core}} \approx \frac{\delta U_{elastic}^{core}}{\delta h_{core}} \quad (\text{Eq. 9})$$

333 with  $\delta$  indicating small changes. Indeed, in the core, the average compressive strain of the  
334 filaments is  $\epsilon_{core} \sim 0.04$  (Figure 3D) and therefore considered to be small. Assuming all elastic  
335 energy to be released in the resting state, we have  $\delta U_{elastic}^{core} = U_{elastic}^{core}$  and  $\delta h_{core} = \epsilon_{core} \times h_{core}$ .

336 Therefore, we find:

$$337 \quad F_{elastic}^{core} \approx \frac{U_{elastic}^{core}}{\epsilon_{core} \times h_{core}} \quad (\text{Eq. 2})$$

338 Note that this is an order of magnitude estimate: since the actin network is assembled under  
339 pressure, it is likely that its resting state has a non-zero elastic energy, in which case the force is  
340 overestimated. The precise architecture of the network could also yield a prefactor in the relation  
341 between  $\delta h_{core}$  and  $\epsilon_{core}$ . Lastly, the elastic energy could be underestimated: part of it might be  
342 stored in crosslinker elasticity and in tension of the non-bent segments of actin filaments.

343

### 344 **Pressure induced in the podosome core**

345 Assuming a circular shape of radius  $r_{core}$  for the core, the pressure was computed as:

$$346 \quad P = \frac{F_{elastic}^{core}}{\pi r_{core}^2} \quad (\text{Eq. 10})$$

347 In the rest of this section, the values used to compute the pressure from the cryo-ET data and the  
348 PFM force measurements reported in <sup>16</sup> are detailed.

349

#### 350 **a) From the tomograms**

351 The pressure induced by the compression of the actin filaments (labelled as “Elastic”, **Figure 4A**)  
352 and by the polymerization at the membrane (labelled as “Polymerization”) were evaluated using  
353 the values for  $r_{core}$  estimated from the fits of the orientation data (**Figure 1E, inset**).

354

#### 355 **b) From PFM force measurements**

356 The pressure  $P_{PFM}$  was computed using the force value  $F = 10.4 \pm 3.8$  nN reported in <sup>16</sup> and  
357  $r_{core} = 203.1 \pm 37.8$  nm estimated from the average of 10 podosomes (black dashed line in **Figure**  
358 **1E, inset**). The error bar for this value was computed using the propagation of uncertainty method  
359 as follows:

$$360 \quad \Delta P_{PFM} = \frac{2F_{elastic}^{core}}{\pi r_{core}^3} \Delta r_{core} + \frac{1}{\pi r_{core}^2} \Delta F_{elastic}^{core} \quad (\text{Eq. 11})$$

361 We found  $P_{PFM} = 80.0 \pm 59.0$  kPa, with the margin of error  $\Delta P_{PFM}$  represented as a rectangular  
362 blue area filled in **Figure 4B**.

363

### 364 **Resource availability**

365 All data and code used in the analysis are available upon request to the corresponding authors.

366

## 367 References

- 368 1 Pollard, T. D. & Cooper, J. A. Actin, a central player in cell shape and movement. *Science*  
369 **326**, 1208-1212, doi:10.1126/science.1175862 (2009).
- 370 2 Harris, A. R., Jreij, P. & Fletcher, D. A. Mechanotransduction by the Actin Cytoskeleton:  
371 Converting Mechanical Stimuli into Biochemical Signals. *Annual Review of Biophysics*,  
372 *Vol 47* **47**, 617-631, doi:10.1146/annurev-biophys-070816-033547 (2018).
- 373 3 Mogilner, A. & Oster, G. Cell motility driven by actin polymerization. *Biophysical Journal*  
374 **71**, 3030-3045 (1996).
- 375 4 Peskin, C. S., Odell, G. M. & Oster, G. F. Cellular motions and thermal fluctuations: the  
376 Brownian ratchet. *Biophysical Journal* **65**, 316-324, doi:10.1016/S0006-3495(93)81035-  
377 X (1993).
- 378 5 Hill, T. L. & Kirschner, M. W. Subunit treadmill of microtubules or actin in the presence  
379 of cellular barriers: possible conversion of chemical free energy into mechanical work.  
380 *Proceedings of the National Academy of Sciences of the United States of America* **79**,  
381 490-494, doi:10.1073/pnas.79.2.490 (1982).
- 382 6 Hill, T. L. & Kirschner, M. W. Bioenergetics and kinetics of microtubule and actin filament  
383 assembly-disassembly. *Int Rev Cytol* **78**, 1-125 (1982).
- 384 7 Footer, M. J., Kerssemakers, J. W., Theriot, J. A. & Dogterom, M. Direct measurement of  
385 force generation by actin filament polymerization using an optical trap. *Proceedings of the*  
386 *National Academy of Sciences of the U.S.A.* **104**, 2181-2186,  
387 doi:10.1073/pnas.0607052104 (2007).
- 388 8 Derenyi, I., Julicher, F. & Prost, J. Formation and interaction of membrane tubes. *Physical*  
389 *review letters* **88**, 238101, doi:10.1103/PhysRevLett.88.238101 (2002).
- 390 9 Atilgan, E., Wirtz, D. & Sun, S. X. Mechanics and dynamics of actin-driven thin membrane  
391 protrusions. *Biophysical journal* **90**, 65-76, doi:10.1529/biophysj.105.071480 (2006).
- 392 10 Ding, B. *et al.* Recording the dynamic endocytosis of single gold nanoparticles by AFM-  
393 based force tracing. *Nanoscale* **7**, 7545-7549, doi:10.1039/c5nr01020a (2015).
- 394 11 Giardini, P. A., Fletcher, D. A. & Theriot, J. A. Compression forces generated by actin  
395 comet tails on lipid vesicles. *Proceedings of the National Academy of Sciences of the*  
396 *United States of America* **100**, 6493-6498, doi:10.1073/pnas.1031670100 (2003).
- 397 12 Parekh, S. H., Chaudhuri, O., Theriot, J. A. & Fletcher, D. A. Loading history determines  
398 the velocity of actin-network growth. *Nature cell biology* **7**, 1219-1223,  
399 doi:10.1038/ncb1336 (2005).
- 400 13 Mueller, J. *et al.* Load Adaptation of Lamellipodial Actin Networks. *Cell* **171**, 188-200 e116,  
401 doi:10.1016/j.cell.2017.07.051 (2017).
- 402 14 Prass, M., Jacobson, K., Mogilner, A. & Radmacher, M. Direct measurement of the  
403 lamellipodial protrusive force in a migrating cell. *The Journal of cell biology* **174**, 767-772,  
404 doi:10.1083/jcb.200601159 (2006).
- 405 15 Basu, R., Munteanu, E. L. & Chang, F. Role of turgor pressure in endocytosis in fission  
406 yeast. *Molecular biology of the cell* **25**, 679-687, doi:10.1091/mbc.E13-10-0618 (2014).
- 407 16 Proag, A. *et al.* Working together: spatial synchrony in the force and actin dynamics of  
408 podosome first neighbors. *ACS nano* **9**, 3800-3813, doi:10.1021/nn506745r (2015).
- 409 17 Dmitrieff, S. & Nedelec, F. Amplification of actin polymerization forces. *The Journal of cell*  
410 *biology* **212**, 763-766, doi:10.1083/jcb.201512019 (2016).

- 411 18 Mund, M. *et al.* Systematic Nanoscale Analysis of Endocytosis Links Efficient Vesicle  
412 Formation to Patterned Actin Nucleation. *Cell* **174**, 884-896 e817,  
413 doi:10.1016/j.cell.2018.06.032 (2018).
- 414 19 Akamatsu, M. *et al.* Principles of self-organization and load adaptation by the actin  
415 cytoskeleton during clathrin-mediated endocytosis. *eLife* **9**, doi:10.7554/eLife.49840  
416 (2020).
- 417 20 Ma, R. & Berro, J. Structural organization and energy storage in crosslinked actin  
418 assemblies. *PLoS computational biology* **14**, e1006150,  
419 doi:10.1371/journal.pcbi.1006150 (2018).
- 420 21 Jasnin, M. *et al.* Three-dimensional architecture of actin filaments in *Listeria*  
421 *monocytogenes* comet tails. *Proceedings of the National Academy of Sciences of the*  
422 *United States of America* **110**, 20521-20526, doi:10.1073/pnas.1320155110 (2013).
- 423 22 Jasnin, M. *et al.* The Architecture of Traveling Actin Waves Revealed by Cryo-Electron  
424 Tomography. *Structure* **27**, 1211-1223 e1215, doi:10.1016/j.str.2019.05.009 (2019).
- 425 23 Jasnin, M., Ecke, M., Baumeister, W. & Gerisch, G. Actin Organization in Cells  
426 Responding to a Perforated Surface, Revealed by Live Imaging and Cryo-Electron  
427 Tomography. *Structure* **24**, 1031-1043, doi:10.1016/j.str.2016.05.004 (2016).
- 428 24 Labernadie, A. *et al.* Protrusion force microscopy reveals oscillatory force generation and  
429 mechanosensing activity of human macrophage podosomes. *Nat. Commun.* **5**, 5343,  
430 doi:10.1038/ncomms6343 (2014).
- 431 25 Bouissou, A. *et al.* Podosome Force Generation Machinery: A Local Balance between  
432 Protrusion at the Core and Traction at the Ring. *ACS nano* **11**, 4028-4040,  
433 doi:10.1021/acsnano.7b00622 (2017).
- 434 26 Hill, T. L. Microfilament or microtubule assembly or disassembly against a force.  
435 *Proceedings of the National Academy of Sciences of the United States of America* **78**,  
436 5613-5617, doi:10.1073/pnas.78.9.5613 (1981).
- 437 27 Broedersz, C. P. & MacKintosh, F. C. Modeling semiflexible polymer networks. *Rev Mod*  
438 *Phys* **86**, 995-1036, doi:10.1103/RevModPhys.86.995 (2014).
- 439 28 De La Cruz, E. M. & Gardel, M. L. Actin Mechanics and Fragmentation. *Journal of*  
440 *Biological Chemistry* **290**, 17137-17144, doi:10.1074/jbc.R115.636472 (2015).
- 441 29 Planade, J. *et al.* Mechanical stiffness of reconstituted actin patches correlates tightly with  
442 endocytosis efficiency. *PLoS biology* **17**, e3000500, doi:10.1371/journal.pbio.3000500  
443 (2019).
- 444 30 Bieling, P. *et al.* Force Feedback Controls Motor Activity and Mechanical Properties of  
445 Self-Assembling Branched Actin Networks. *Cell* **164**, 115-127,  
446 doi:10.1016/j.cell.2015.11.057 (2016).
- 447 31 Gittes, F., Mickey, B., Nettleton, J. & Howard, J. Flexural rigidity of microtubules and actin  
448 filaments measured from thermal fluctuations in shape. *The Journal of cell biology* **120**,  
449 923-934, doi:10.1083/jcb.120.4.923 (1993).
- 450 32 Satcher, R. L., Jr. & Dewey, C. F., Jr. Theoretical estimates of mechanical properties of  
451 the endothelial cell cytoskeleton. *Biophysical journal* **71**, 109-118, doi:10.1016/S0006-  
452 3495(96)79206-8 (1996).
- 453 33 Fischer-Friedrich, E., Hyman, A. A., Julicher, F., Muller, D. J. & Helenius, J. Quantification  
454 of surface tension and internal pressure generated by single mitotic cells. *Scientific reports*  
455 **4**, doi:Artn 621310.1038/Srep06213 (2014).
- 456 34 Paul, R., Heil, P., Spatz, J. P. & Schwarz, U. S. Propagation of mechanical stress through  
457 the actin cytoskeleton toward focal adhesions: Model and experiment. *Biophysical journal*

- 458 **94**, 1470-1482, doi:10.1529/biophysj.107.108688 (2008).
- 459 35 Manificier, I. *et al.* The consequence of substrates of large-scale rigidity on actin network  
460 tension in adherent cells. *Comput Method Biomec* **22**, 1073-1082,  
461 doi:10.1080/10255842.2019.1629428 (2019).
- 462 36 Tsekouras, K., Lacoste, D., Mallick, K. & Joanny, J. F. Condensation of actin filaments  
463 pushing against a barrier. *New journal of physics* **13**, doi:Artn 10303210.1088/1367-  
464 2630/13/10/103032 (2011).
- 465 37 Van Goethem, E., Poincloux, R., Gauffre, F., Maridonneau-Parini, I. & Le Cabec, V. Matrix  
466 Architecture Dictates Three-Dimensional Migration Modes of Human Macrophages:  
467 Differential Involvement of Proteases and Podosome-Like Structures. *Journal of*  
468 *immunology* **184**, 1049-1061, doi:10.4049/jimmunol.0902223 (2010).
- 469 38 Rigort, A. *et al.* Micromachining tools and correlative approaches for cellular cryo-electron  
470 tomography. *J. Struct. Biol.* **172**, 169-179, doi:10.1016/j.jsb.2010.02.011 (2010).
- 471 39 Rigort, A. *et al.* Focused ion beam micromachining of eukaryotic cells for cryoelectron  
472 tomography. *Proceedings of the National Academy of Sciences of the United States of*  
473 *America* **109**, 4449-4454, doi:10.1073/pnas.1201333109 (2012).
- 474 40 Fukuda, Y., Laugks, U., Lucic, V., Baumeister, W. & Danev, R. Electron cryotomography  
475 of vitrified cells with a Volta phase plate. *Journal of structural biology* **190**, 143-154,  
476 doi:10.1016/j.jsb.2015.03.004 (2015).
- 477 41 Li, X. *et al.* Electron counting and beam-induced motion correction enable near-atomic-  
478 resolution single-particle cryo-EM. *Nature methods* **10**, 584-590, doi:10.1038/nmeth.2472  
479 (2013).
- 480 42 Kremer, J. R., Mastrorade, D. N. & McIntosh, J. R. Computer visualization of three-  
481 dimensional image data using IMOD. *Journal of structural biology* **116**, 71-76,  
482 doi:10.1006/jsbi.1996.0013 (1996).
- 483 43 Stalling, D., Westerhoff, M., Hege H-C Amira: A highly interactive system for visual data  
484 analysis. *Elsevier, Butterworth-Heinemann*, 749-767 (2005).
- 485 44 Rigort, A. *et al.* Automated segmentation of electron tomograms for a quantitative  
486 description of actin filament networks. *J. Struct. Biol.* **177**, 135-144,  
487 doi:10.1016/j.jsb.2011.08.012 (2012).
- 488 45 Koestler, S. A. *et al.* F- and G-actin concentrations in lamellipodia of moving cells. *PLoS*  
489 *one* **4**, e4810, doi:10.1371/journal.pone.0004810 (2009).
- 490 46 Pollard, T. D., Blanchoin, L. & Mullins, R. D. Molecular mechanisms controlling actin  
491 filament dynamics in nonmuscle cells. *Annu Rev Biophys Biomol Struct* **29**, 545-576,  
492 doi:10.1146/annurev.biophys.29.1.545 (2000).
- 493 47 Le Clainche, C. & Carlier, M. F. Regulation of actin assembly associated with protrusion  
494 and adhesion in cell migration. *Physiol Rev* **88**, 489-513, doi:10.1152/physrev.00021.2007  
495 (2008).

## 496 497 **Acknowledgements**

498 This work benefited from the assistance of Vanessa Soldan from the Multiscale Electron Imaging  
499 platform (METi) of the Centre de Biologie Intégrative (CBI). The authors thank Martin Lenz for  
500 helpful discussions. This work was supported by the Human Frontier Science Program  
501 (RGP0035/2016), la Fondation pour la Recherche Médicale (FRM DEQ2016 0334894), a CNRS



502 Momentum fellowship, l'Agence Nationale de la Recherche and Deutsche  
503 Forschungsgemeinschaft (ANR-DFG JA-3038/2-1) and with financial support from ITMO Cancer  
504 of Aviesan on funds managed by Inserm.

505

#### 506 **Contributions**

507 MJ, RP designed the project. AB, RP prepared the cells. SB vitrified the cells. MJ performed cryo-  
508 FIB milling, cryo-ET, tomogram reconstruction and segmentation. MJ, JH, AP, RP designed and  
509 performed the experimental analysis. RV, SD designed the theoretical analysis. JH, SD performed  
510 the theoretical analysis. MJ, SD, RP supervised the project. MJ, IMP, WB, SD, RP obtained  
511 funding. MJ, JH, SD, RP wrote the manuscript with input from the others.

512

#### 513 **Ethics declaration**

514 The authors declare no competing interests.

515

516

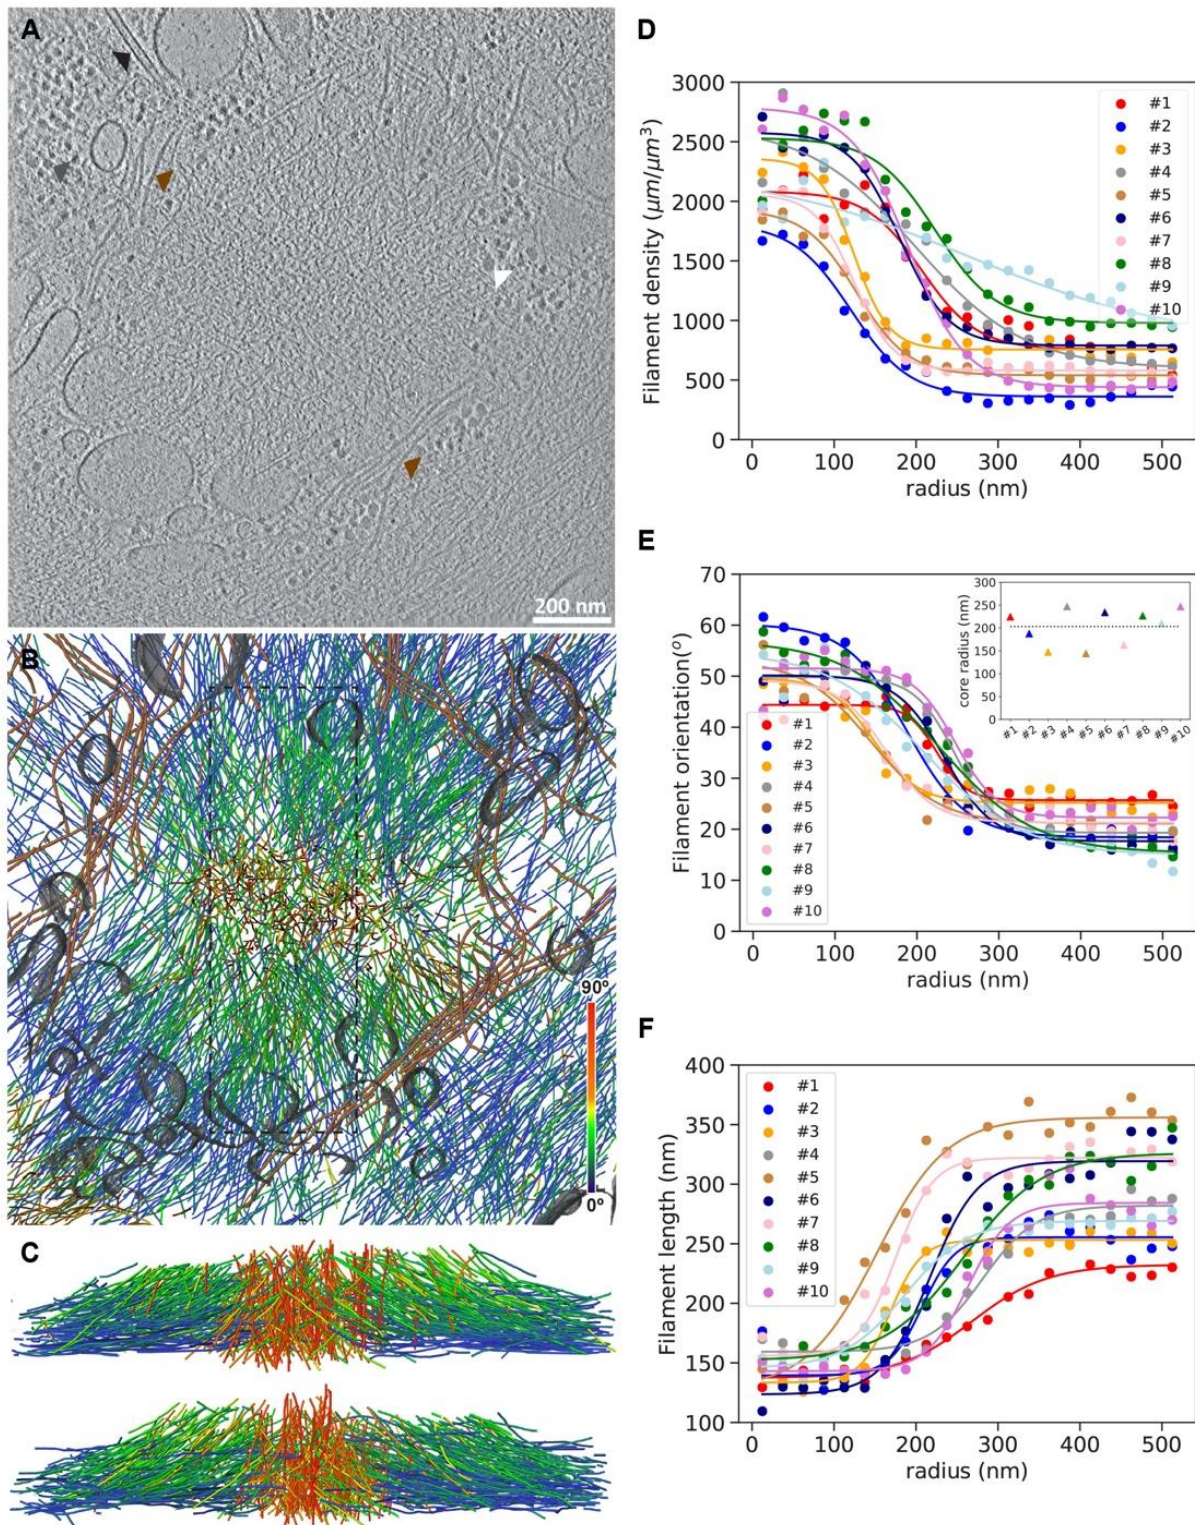

517

518 **Fig. 1: Cryo-electron tomography allows quantitative analysis of actin filament**  
519 **organization in native podosomes.**

520 **A:** Slice from a tomographic volume acquired in a frozen-hydrated human macrophage revealing  
521 the podosome environment. Colored arrows point to ribosomes (grey), glycogen granules (white),

522 a microtubule (black), and intermediate filaments (brown). See also [Movie S1](#).  
523 **B**: Orthographic view of the corresponding 3D segmentation of the actin filaments showing their  
524 relative orientation with respect to the basal membrane, intermediate filaments (brown), and  
525 organelle membranes (grey).  
526 **C**: Perspective views of the actin filaments in the volume indicated by a dotted rectangle in (B)  
527 shown from the left (top) and right (bottom) sides.  
528 **D-F**: Average filament density (**D**), orientation (**E**) and length (**F**) as a function of the radial  
529 distance from the core center for ten tomograms. Inset in (**E**): Corresponding values estimated  
530 for the core radius ([Methods](#)). The podosome shown in (**A-C**) corresponds to #9.

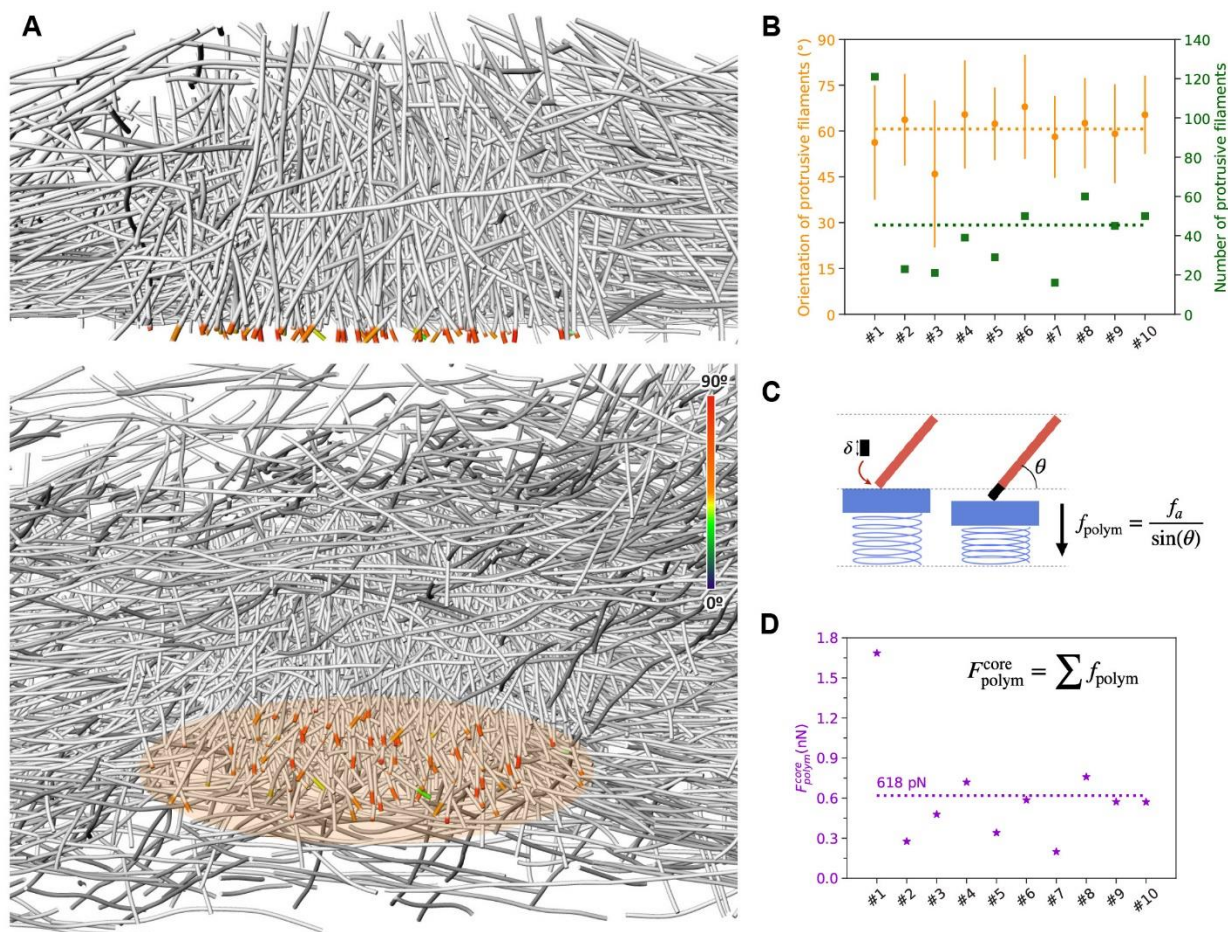

531

532 **Fig. 2. The sum of the actin polymerization forces at the core membrane is below 1 nN.**

533 **A:** (Top) Perspective view of a cross-section through podosome #8 displaying in color the part of  
 534 the core filaments pushing against the plasma membrane. (Bottom) Orthographic view of the  
 535 same podosome from a different angle. The color map corresponds to the filament orientation  
 536 with respect to the basal membrane. See also [Movie S3](#).

537 **B:** Mean orientation (orange) and number (green) of polymerizing filaments at the core  
 538 membrane.

539 **C:** Scheme representing the polymerization force generated by the addition of a new monomer  
 540 at the growing end of a filament with an inclination  $\theta$  relative to the membrane.

541 **D:** Estimated polymerization force generated at the core membrane.

542

543

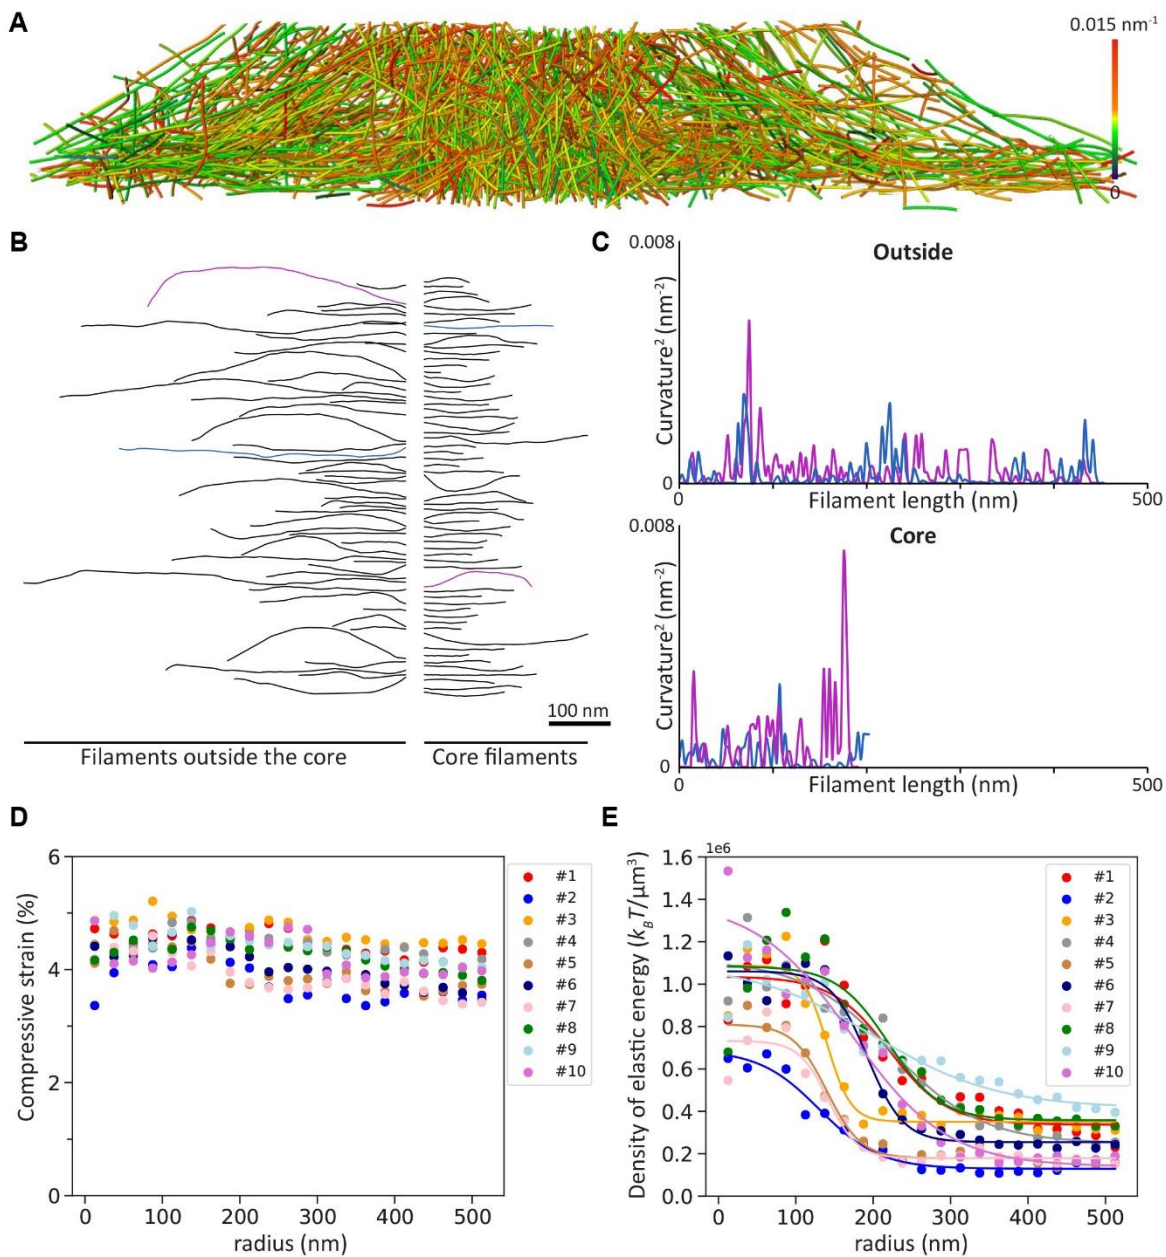

544

545 **Fig. 3. Podosome filaments are compressed and store high elastic energy inside the**  
 546 **core.**

547 **A:** Perspective view of a cross-section through podosome #1 displaying the mean curvature of the filaments. See also [Movie S4](#).  
 548

549 **B:** Gallery of a random selection of actin filaments from podosome #1. Filaments from the core (right) and outside the core (left) are shown.  
 550

551 **C:** Square of the local curvature along the filament length for the blue and purple filaments from the galleries of filaments outside (top) and inside (bottom) the core shown in (B).  
 552

553 **D:** Average compressive strain as a function of the radial distance from the core center for ten tomograms.  
 554

555 **E:** Density of elastic energy as a function of the radial distance from the core center for ten tomograms.  
 556

557

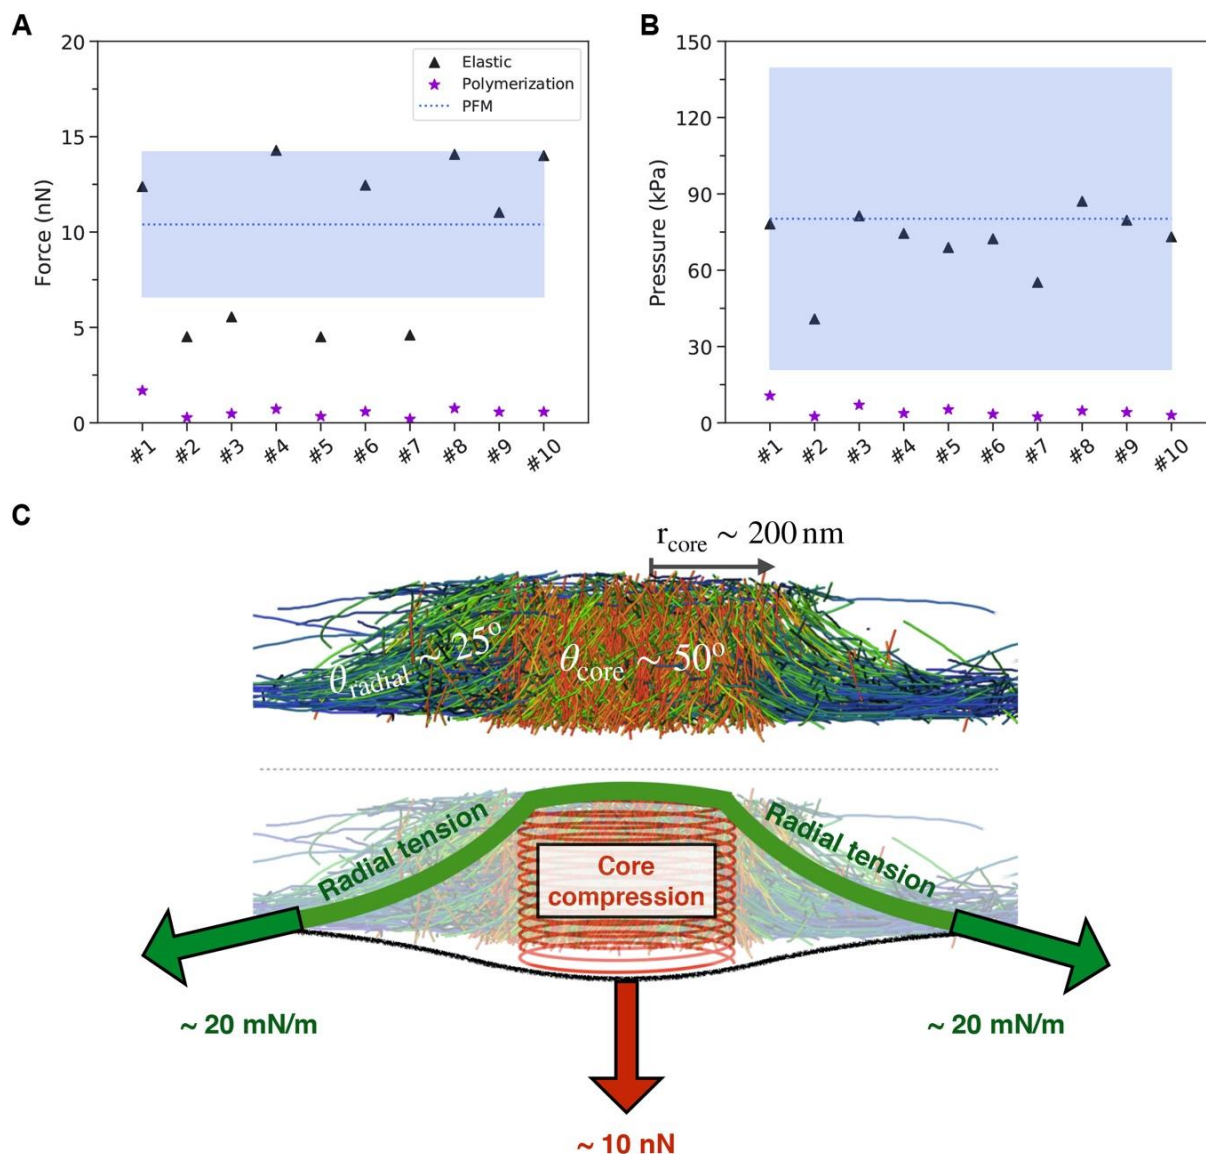

558

559 **Fig. 4. The actin core generates elastic forces in the nanonewton range.**

560 **A:** Comparison of the elastic force (“Elastic”) generated by the core through the compression of  
 561 the actin network (black triangle) with the estimated polymerization force (“Polymerization”)  
 562 generated at the core membrane (purple stars). The blue dashed line corresponds to the mean  
 563 force derived from PFM measurements (“PFM”) <sup>16</sup> and the rectangular area filled in blue  
 564 represents its standard deviation.

565 **B:** Same comparison plot as in (A) for the estimated pressure assuming a perfect circular shape  
 566 for the podosome core (Methods).

567 **C:** Summary scheme showing the podosome organization revealed by cryo-ET, the elastic force  
 568 resulting from core compression and the radial surface tension counterbalancing it.

569

570

571 **Supplemental information**

572

573 **Movie S1. Native podosome architecture revealed by *in situ* cryo-ET.**

574 This movie shows the tomogram of the podosome presented in **Figure 1A-C** followed by its  
575 segmentation. Actin filaments are colored as a function of their orientation with respect to the  
576 basal membrane. Intermediate filaments are in brown and membranes in grey. Successive  
577 rotation, sectioning and zoom in the segmented volume allow the visualization of the dense  
578 organization of the actin filaments of the podosome core.

579

580 **Movie S2. Architecture of unroofed podosomes by cryo-ET.**

581 This movie shows the tomogram of unroofed podosomes presented in **Figure S6** followed by its  
582 segmentation. Actin filaments are colored as a function of their orientation with respect to the  
583 basal membrane. Successive rotations, sectioning and zoom in the segmented volume reveal the  
584 nanoscale actin organization of neighboring podosomes.

585

586 **Movie S3. Visualization of the actin filaments in the vicinity of the plasma membrane  
587 beneath a podosome core.**

588 This movie shows the actin segmentation of the podosome presented in **Figure 2A**. Core filament  
589 segments in the vicinity of the basal membrane are colored as a function of their orientation. A  
590 series of rotations, zoomed and unzoomed sections through the segmented volume allow to  
591 visualize the number and orientation of the protrusive filaments at the core.

592

593 **Movie S4. Podosome actin filaments are bent.**

594 This movie shows the actin segmentation of the podosome presented in **Figure 3A**. Actin filaments  
595 are colored as a function of their mean curvature. Successive zoomed sections through the  
596 segmented volume allow to visualize the curvature of the filaments in a native podosome.

Average filament length:  $\langle L \rangle_{[r, r+\delta]}$

**A**

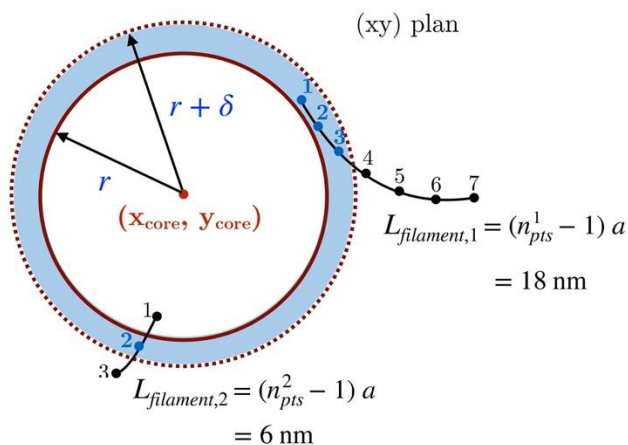

filament 1:

|   | x | y | z | r |
|---|---|---|---|---|
| 1 |   |   |   |   |
| 2 |   |   |   |   |
| 3 |   |   |   |   |
| 4 |   |   |   |   |
| 5 |   |   |   |   |
| 6 |   |   |   |   |
| 7 |   |   |   |   |

filament 2:

|   | x | y | z | r |
|---|---|---|---|---|
| 1 |   |   |   |   |
| 2 |   |   |   |   |
| 3 |   |   |   |   |

**B**

$$\langle L \rangle_{[r, r+\delta]} = \frac{1}{n_{pts,in}^{tot}} \sum_{i=1, \in [r, r+\delta]}^{n_{fil}} n_{pts,in}^i L_{filament,i}$$

$$= \frac{1}{4} \left[ \underbrace{L_{filament,1} + L_{filament,1} + L_{filament,1}}_{\text{counted 3 times}} + \underbrace{L_{filament,2}}_{\text{counted 1 time}} \right] = 15 \text{ nm}$$

597

598 **Figure S1. Illustration of the computation of the average filament length as a function of**  
 599 **the radial distance.**

600 **A:** For each distance bin  $[r, r+\delta]$ , the points inside the bins (shown in blue) are identified for each  
 601 actin filament (left). Each point is represented both in cartesian and radial coordinates (right).

602 **B:** The average length in the bin is the mean of the filament lengths weighted by their number of  
 603 points in the bin.  
 604



605

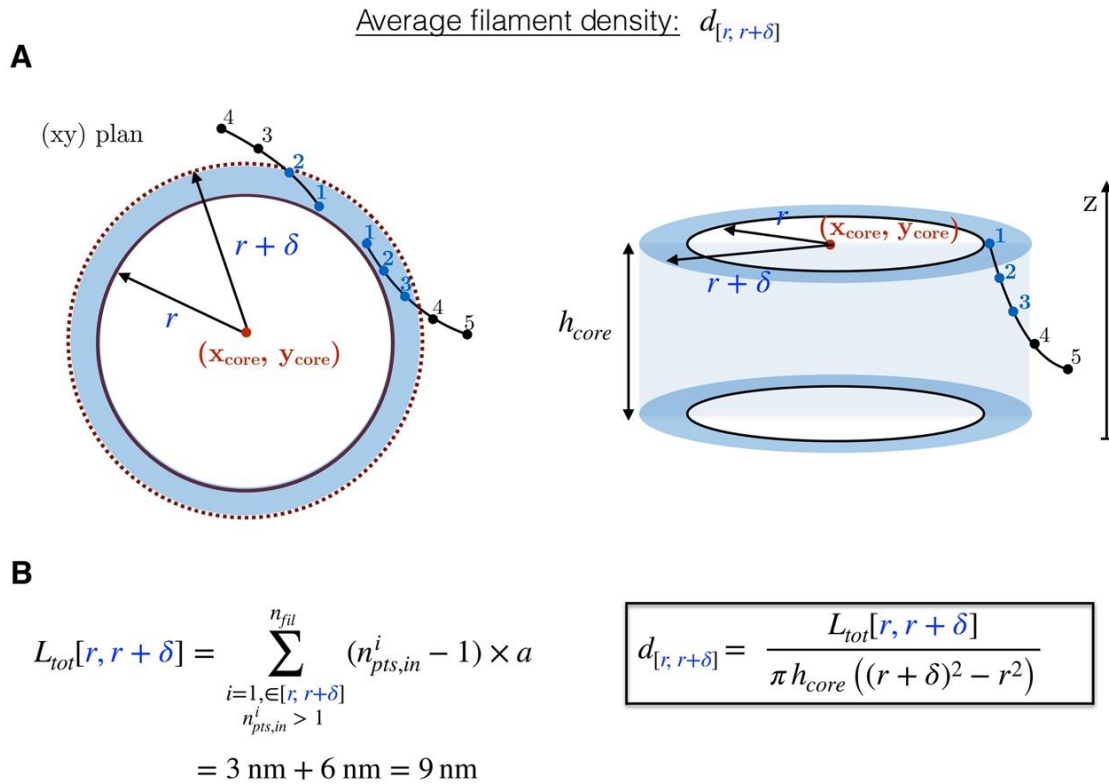

606

607 **Figure S2. Illustration of the computation of the average filament density as a function of**  
 608 **the radial distance.**

609 **A:** For each bin  $[r, r+\delta]$ , the points inside the bins (shown in blue) are identified for each actin  
 610 filament.

611 **B:** The total actin length is calculated in each bin and divided by the bin volume to compute the  
 612 density.

613

614

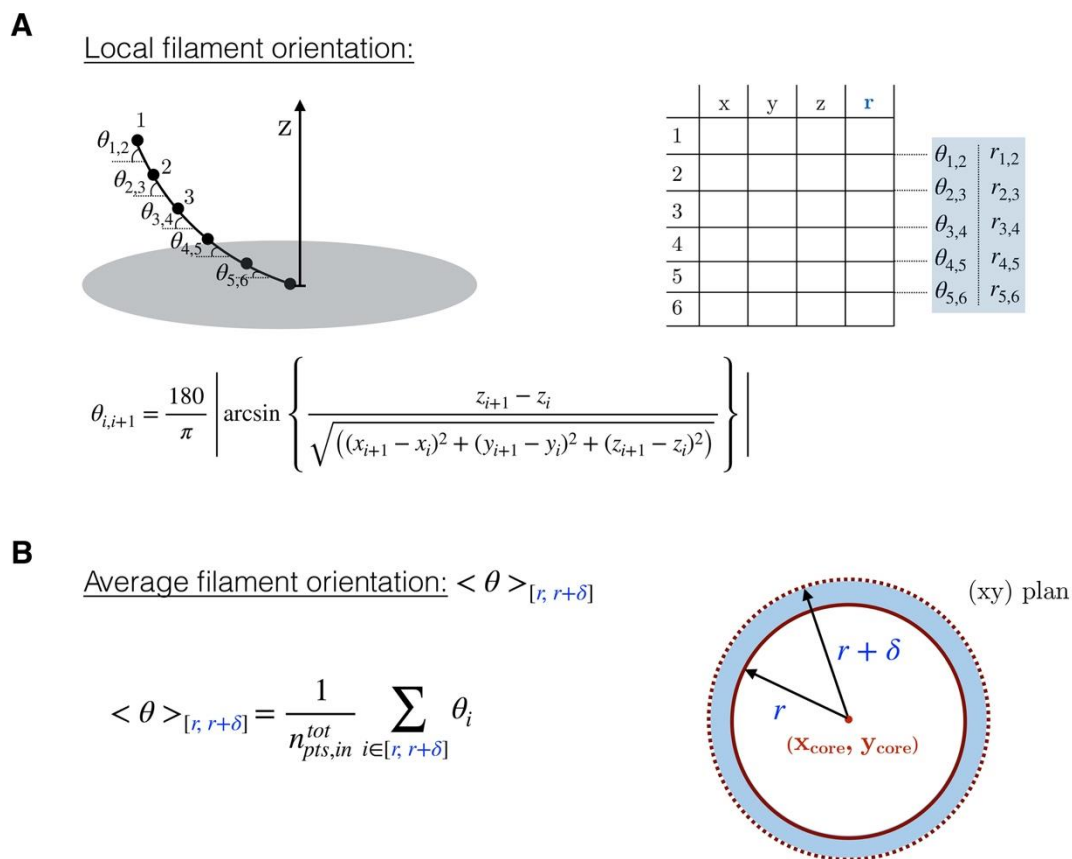

615

616 **Figure S3. Illustration of the computation of the average filament orientation as a function**  
 617 **of the radial distance.**

618 **A:** To each segment between two filament points is associated an angle with respect to the  
 619 membrane plane.

620 **B:** The average filament orientation in a bin is the mean of the orientations of all segments inside  
 621 the bin.

622

623

624

625

626

627

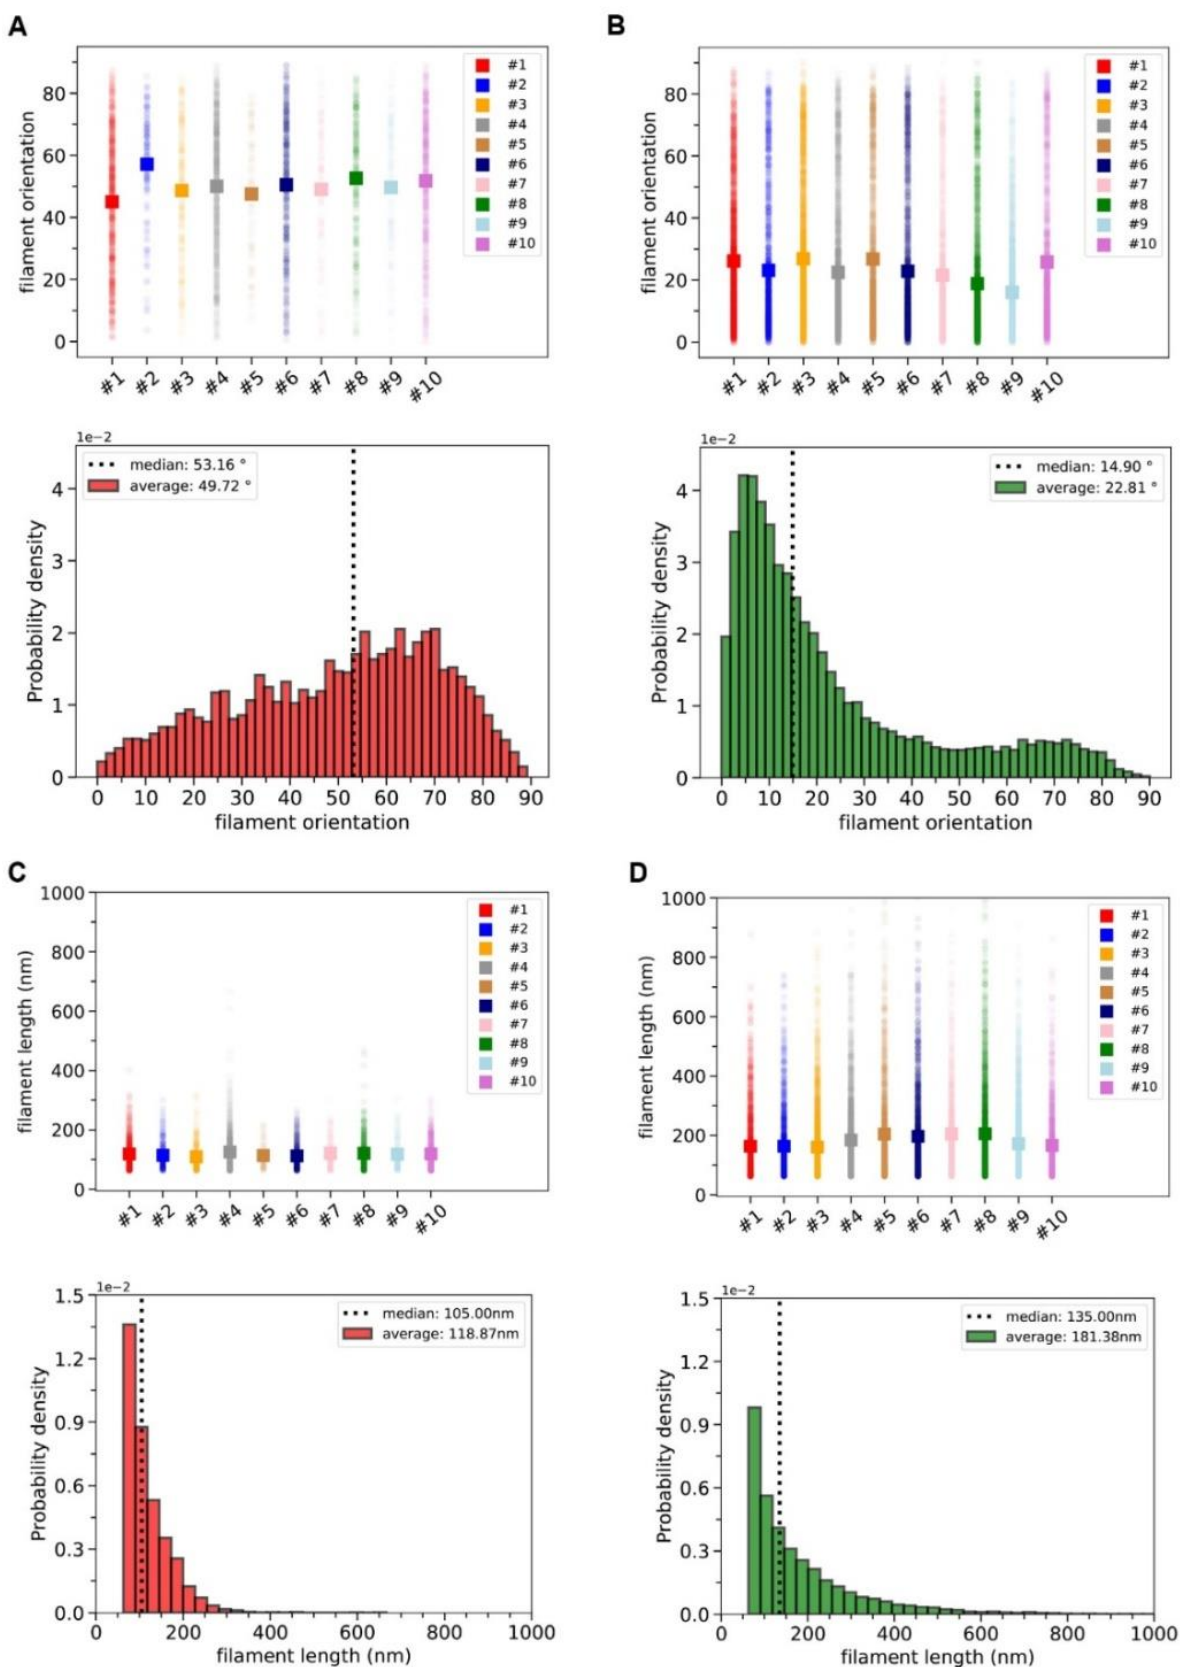

628

629 **Figure S4. Orientation and length distributions of the innermost and outermost filaments,**  
630 **respectively, in ten podosomes.**

631 **A:** (Top) Mean orientation of the innermost filaments within the radial distance range  $r \in [r_0 - r_s, r_0]$ .  
632  $r_0$  and  $r_s$  are the inflection point and transition range parameters, respectively, and were obtained  
633 from the fit of the orientation as a function of  $r$  for each tomogram. (Bottom) Corresponding  
634 distribution obtained by merging all the data from the top panel into a single dataset. The vertical  
635 dashed line indicates the median value of the dataset.

636 **B:** Same distributions for the outermost filaments, *i.e.* within the radial distance range  $r \in$   
637  $[r_0 + r_s, r_{\max}]$  where  $r_{\max}$  is the highest radial distance between a point filament and the core center.

638 **C-D:** Same plots as in **A-B** for the filament length.

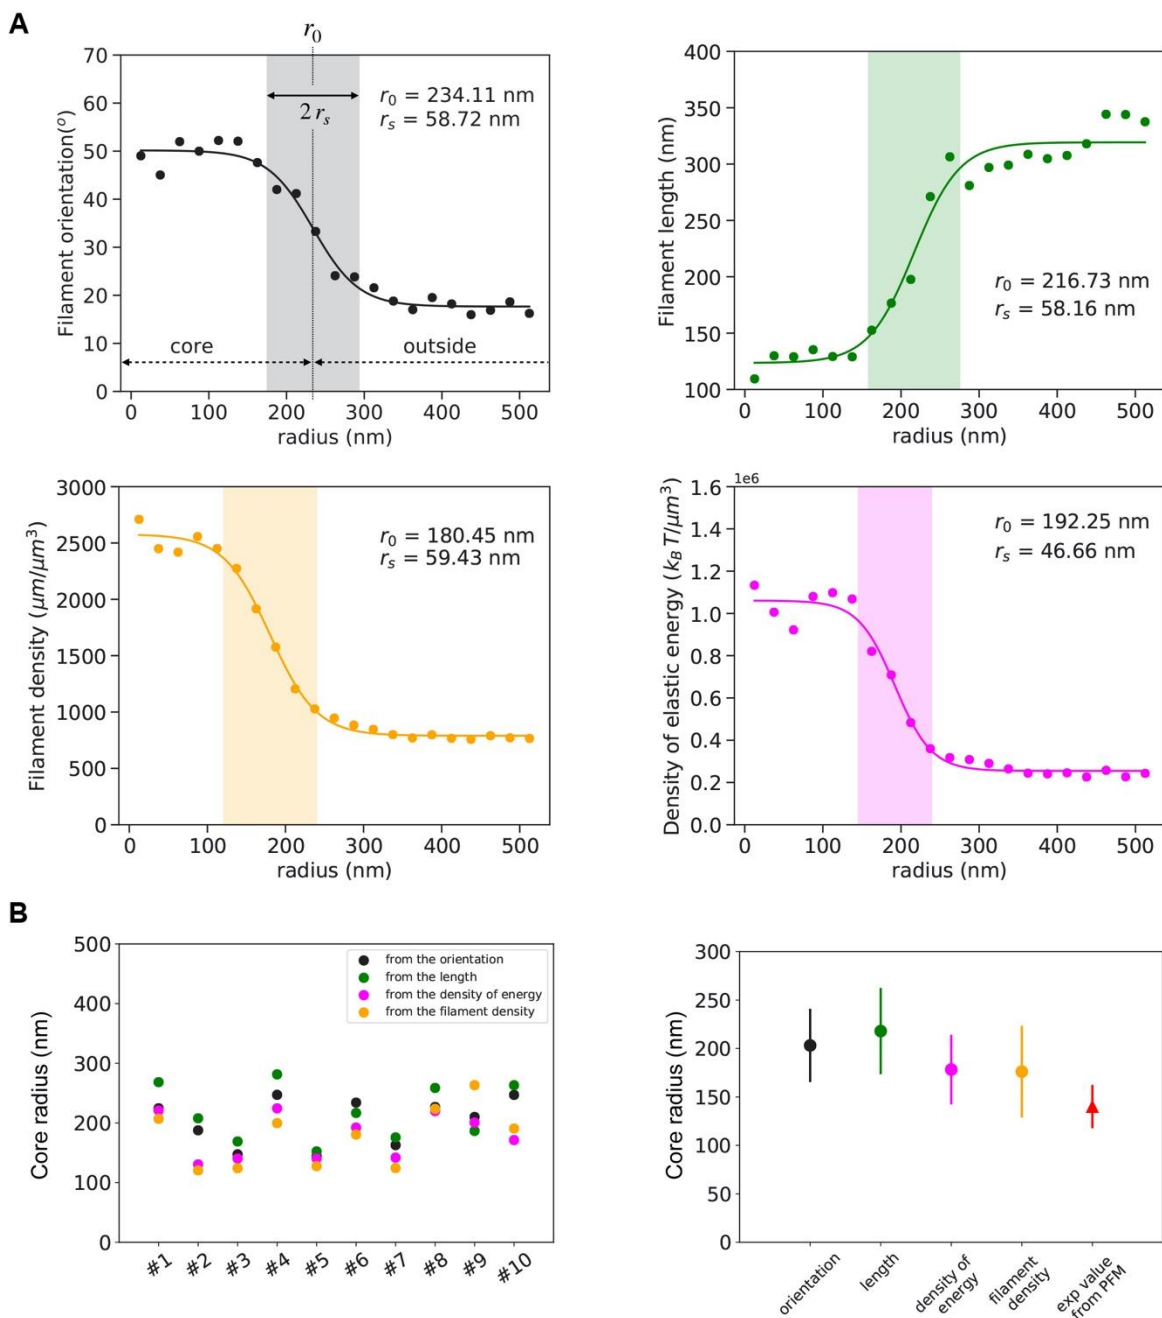

639

640 **Figure S5. Estimation of the core radius from the distribution of each parameter as a**  
 641 **function of the distance to the core center.**

642 **A:** Filament orientation, length, actin density and density of energy for podosome #6 with their  
 643 respective fits are shown. The parameters  $r_0$  and  $r_s$  and the transition (colored) zone are indicated.

644 **B:** (Left) Comparison of the core radius values obtained from the fits of the different parameters  
 645 as a function of the radial distance for the ten tomograms. (Right) Average radius of the podosome  
 646 core estimated from the quantitative analysis of the cryo-ET data and compared to the reported  
 647 value from PFM (mean $\pm$ s.d.).

648

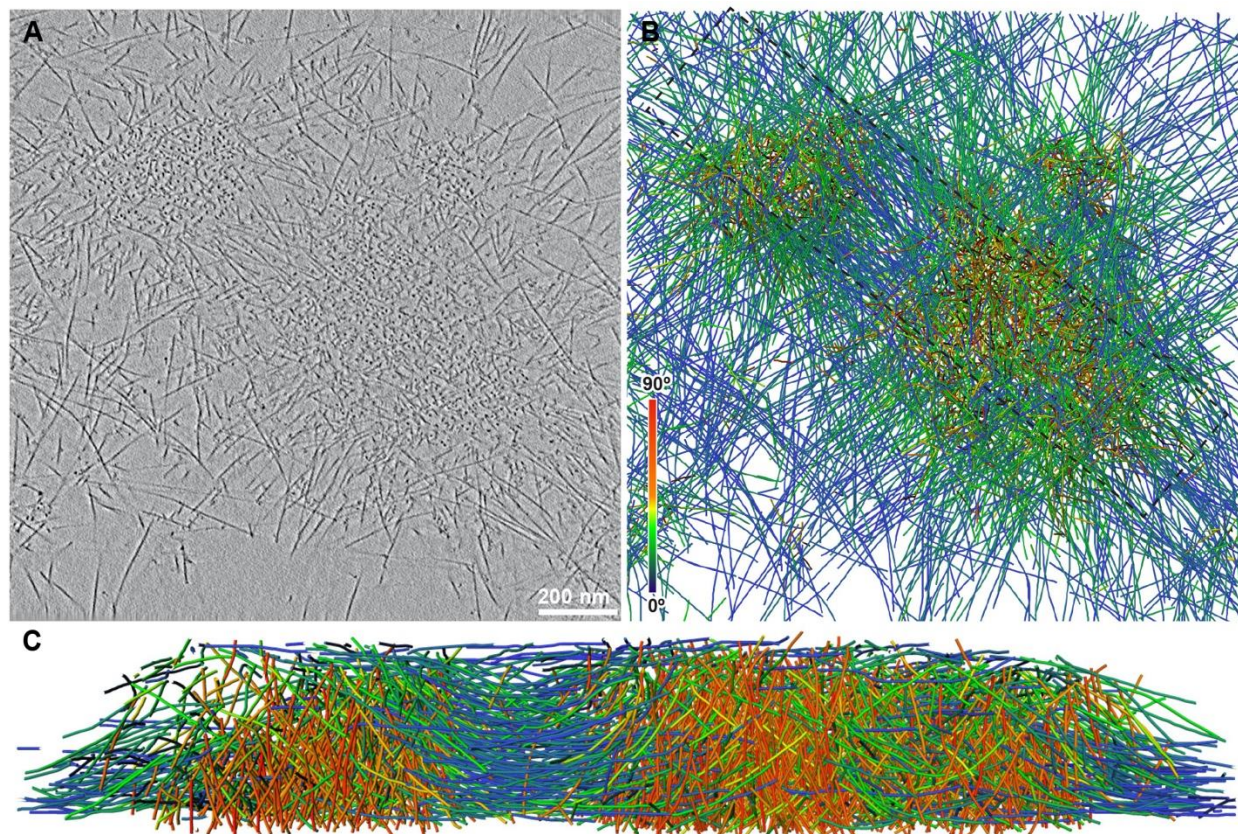

649  
650  
651  
652  
653  
654  
655  
656  
657  
658  
659

**Figure S6. Unroofed podosome architecture revealed by cryo-ET.**

**A:** Slice from a tomographic volume acquired in a plunge-frozen, unroofed human macrophage revealing neighboring podosomes.

**B:** Orthographic view of the corresponding 3D segmentation of the actin filaments showing their relative orientation with respect to the basal membrane.

**C:** Perspective view of the volume indicated by a dotted rectangle in (D) and shown from the left side.

See also [Movie S2](#).

Compressive strain:  $\epsilon$

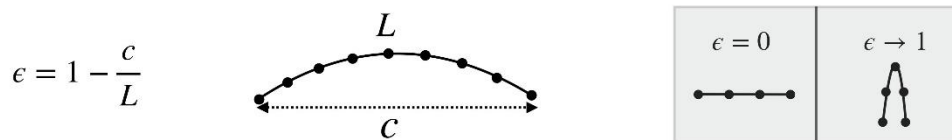

Average compressive strain :  $\langle \epsilon \rangle_{[r,r+\delta]}$

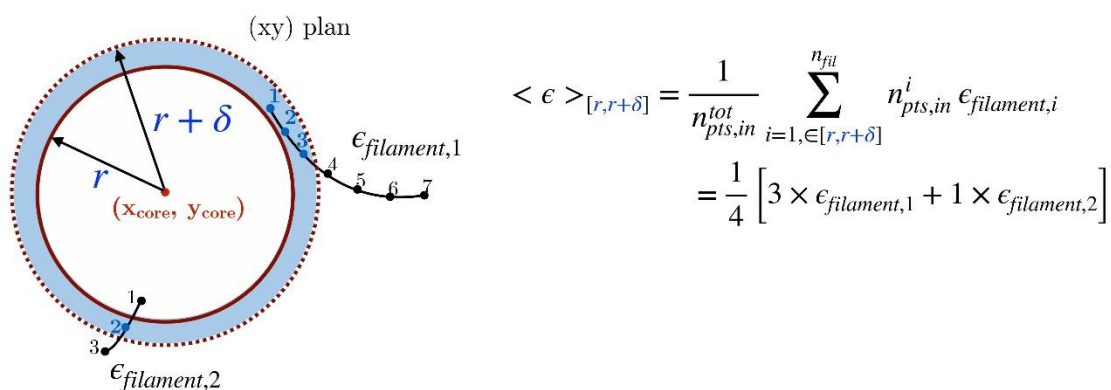

660

661 **Figure S7. Illustration of the computation of the average compressive strain as a function**  
 662 **of the radial distance.**

663 **A:** The compressive strain is computed as 1 minus the ratio between the end-to-end distance,  $c$ ,  
 664 and the filament length,  $L$ . Thus, a straight filament has a zero strain.

665 **B:** The average compressive strain in a bin is computed as the mean of the compressive strains  
 666 weighted by the number of filament points in the bin.

667

668

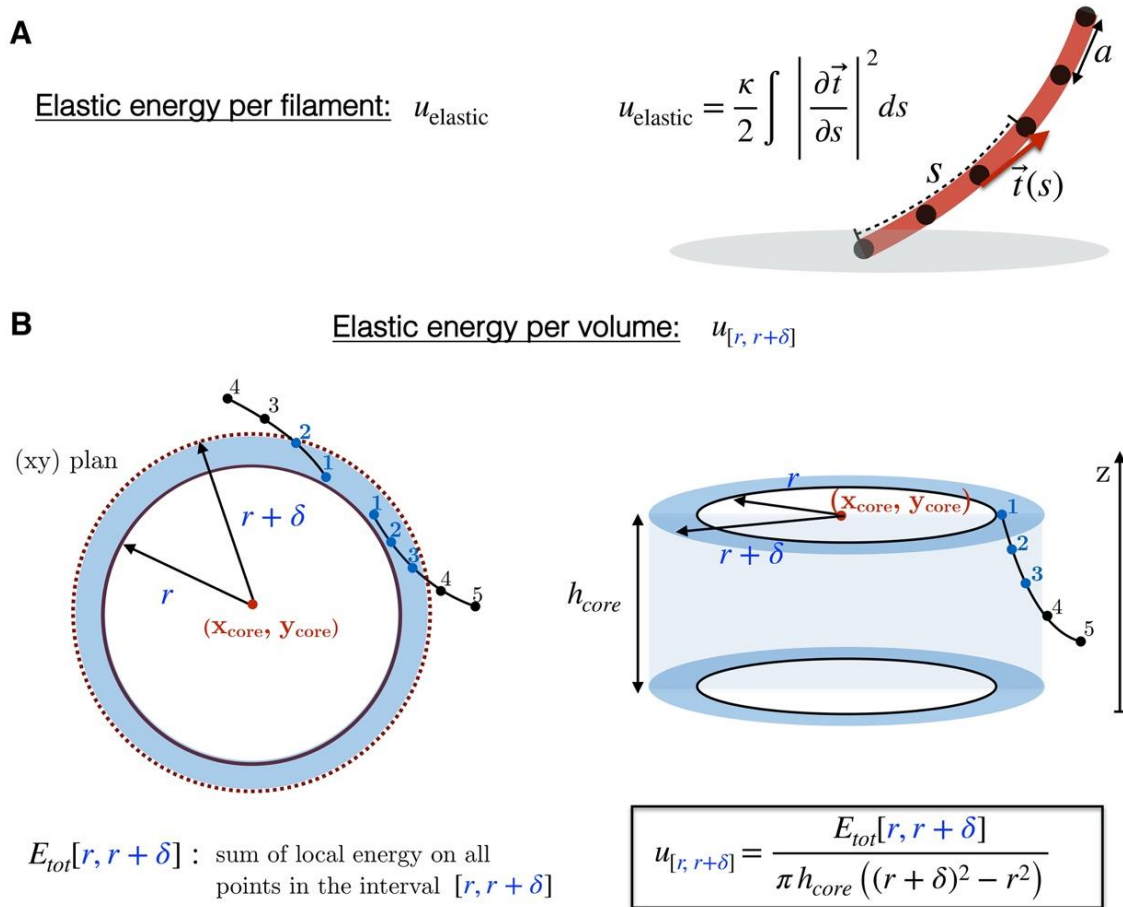

669

670 **Figure S8. Illustration of the computation of the elastic energy per volume as a function of**  
 671 **the radial distance.**

672 **A:** Definition of the elastic energy of a filament as the integral of the squared curvature over the  
 673 filament length.

674 **B:** The density of elastic energy as a function of the radial distance is computed as the sum of  
 675 the elastic energy of all the filament points in the bin divided by the volume.

676

677
